# Supplementary material for: Genealogical Relationships between Early Medieval and Modern Inhabitants of Piedmont
Source: PubMed Central journal article supplement (PMC4312042; doi:10.1371/journal.pone.0116801), 2015-01-30
Supplement: pone.0116801.s002.pdf [file pone.0116801.s002.pdf]

**Model 1-continuity  
plague**

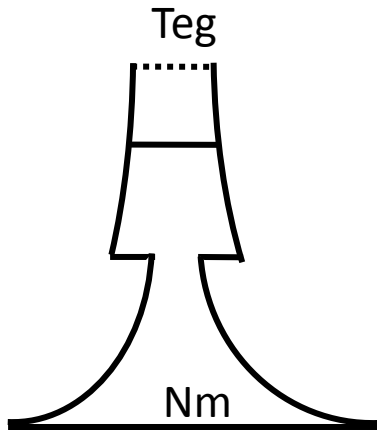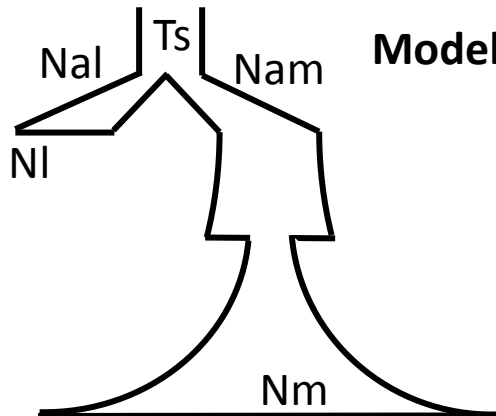

**Model 2-discontinuity  
plague**

Bottleneck size: {U:100,10000}

Bottleneck Intensity: {U:1.1,10}

Bottleneck Time: {U:1,400}
