# Supplementary material for: Genealogical Relationships between Early Medieval and Modern Inhabitants of Piedmont
Source: PubMed Central journal article supplement (PMC4312042; doi:10.1371/journal.pone.0116801), 2015-01-30

**A**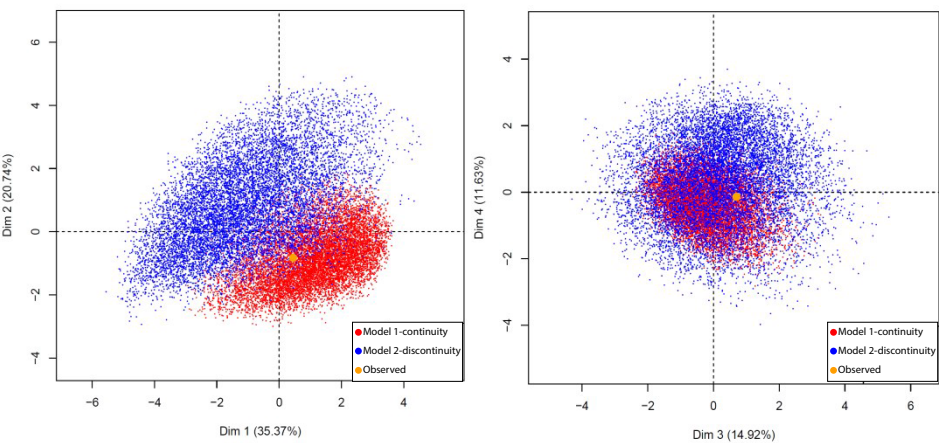**B**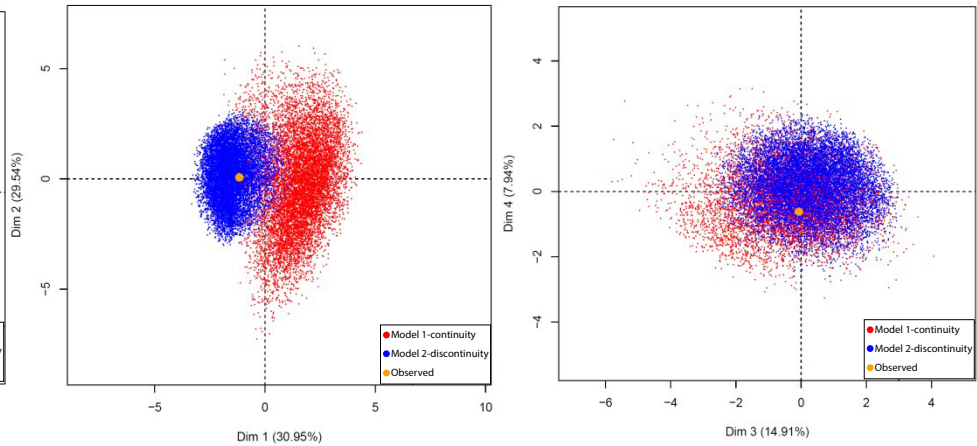**C**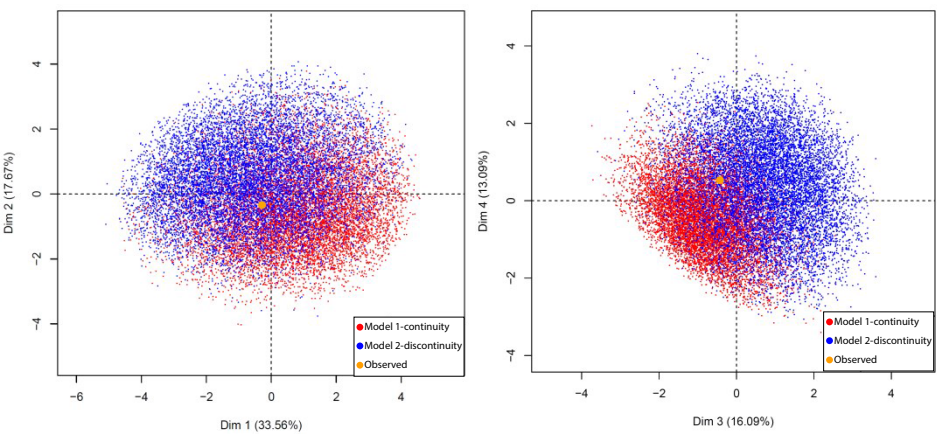**D**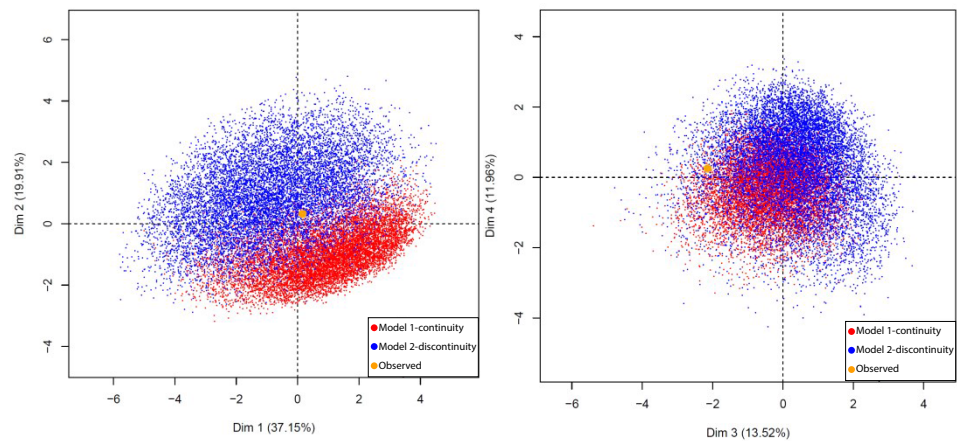

Supplement: pone.0116801.s004.pdf [file pone.0116801.s004.pdf]
