# Supplementary material for: Genealogical Relationships between Early Medieval and Modern Inhabitants of Piedmont
Source: PLoS One. 2015 Jan 30;10(1):e0116801. doi: 10.1371/journal.pone.0116801 (PMC4312042; doi:10.1371/journal.pone.0116801)
Supplement: S1 File — (XLSX) [file pone.0116801.s005.xlsx]

## Sheet: Trino_Vercellese
threshold	Model 1-continuity	Model 2-discontinuity	Model 1-continuity plague	Model 2-discontinuity plague
100	0.62	0.04	0.34	0
200	0.56	0.04	0.4	0
300	0.583333	0.04	0.373333	0.00333333
400	0.575	0.0375	0.3825	0.005
500	0.59	0.042	0.364	0.004
25000	0.589866	0.0406068	0.367612	0.00191534
50000	0.587447	0.0436318	0.367014	0.00190727
75000	0.584285	0.0463247	0.367493	0.00189731
100000	0.580506	0.0487225	0.368753	0.00201773
125000	0.577523	0.0511503	0.36913	0.00219582
150000	0.575188	0.0536771	0.368713	0.00242253
threshold	Model 1-continuity	Model 2-discontinuity		threshold	Model 1-continuity plague	Model 2-discontinuity plague
100	0.93	0.07		100	1	0
200	0.95	0.05		200	0.985	0.015
300	0.936667	0.0633333		300	0.986667	0.0133333
400	0.935	0.065		400	0.9875	0.0125
500	0.918	0.082		500	0.988	0.012
25000	0.937275	0.0627246		25000	0.996354	0.00364616
50000	0.92885	0.0711498		50000	0.996249	0.00375092
75000	0.921469	0.0785306		75000	0.99526	0.00473961
100000	0.914607	0.0853933		100000	0.994436	0.00556423
125000	0.908358	0.0916421		125000	0.993839	0.00616061
150000	0.901571	0.0984286		150000	0.993326	0.006674
threshold	Model 1-continuity	Model 1-continuity plague		threshold	Model 2-discontinuity	Model 2-discontinuity plague
100	0.55	0.45		100	0.93	0.07
200	0.58	0.42		200	0.945	0.055
300	0.57	0.43		300	0.936667	0.0633333
400	0.585	0.415		400	0.9425	0.0575
500	0.588	0.412		500	0.942	0.058
25000	0.612128	0.387872		25000	0.951819	0.0481814
50000	0.608073	0.391927		50000	0.944425	0.0555752
75000	0.606941	0.393059		75000	0.938374	0.0616258
100000	0.605684	0.394316		100000	0.933828	0.0661724
125000	0.605289	0.394711		125000	0.929744	0.0702562
150000	0.605009	0.394991		150000	0.926852	0.0731483

## Sheet: Postua
threshold	Model 1-continuity	Model 2-discontinuity	Model 1-continuity plague	Model 2-discontinuity plague
100	0	0.9	0	0.1
200	0	0.9	0.005	0.095
300	0	0.883333	0.00333333	0.113333
400	0	0.8825	0.0025	0.115
500	0	0.888	0.002	0.11
25000	0.000156706	0.965912	0.00299369	0.0309376
50000	0.000218539	0.961757	0.00469599	0.0333284
75000	0.000346594	0.957952	0.00632328	0.0353778
100000	0.000467871	0.955329	0.00721143	0.0369918
125000	0.000541199	0.953105	0.00812832	0.0382259
150000	0.000609621	0.951316	0.00894087	0.0391332
threshold	Model 1-continuity	Model 2-discontinuity		threshold	Model 1-continuity	Model 2-discontinuity plague
100	0	1		100	0.02	0.98
200	0	1		200	0.025	0.975
300	0	1		300	0.04	0.96
400	0	1		400	0.0425	0.9575
500	0	1		500	0.054	0.946
25000	0.000333643	0.999666		25000	0.147398	0.852602
50000	0.000835451	0.999165		50000	0.13304	0.86696
75000	0.0013603	0.99864		75000	0.122912	0.877088
100000	0.00196277	0.998037		100000	0.116858	0.883142
125000	0.00255027	0.99745		125000	0.113524	0.886476
150000	0.00309278	0.996907		150000	0.110937	0.889063
threshold	Model 1-continuity	Model 1-continuity		threshold	Model 2-discontinuity	Model 2-discontinuity plague
100	0.03	0.97		100	0.92	0.08
200	0.045	0.955		200	0.905	0.095
300	0.0533333	0.946667		300	0.906667	0.0933333
400	0.0575	0.9425		400	0.9025	0.0975
500	0.076	0.924		500	0.9	0.1
25000	0.0488365	0.951164		25000	0.972135	0.0278653
50000	0.0645035	0.935496		50000	0.968065	0.0319346
75000	0.0753078	0.924692		75000	0.965787	0.0342127
100000	0.0840626	0.915937		100000	0.963887	0.0361127
125000	0.0915603	0.90844		125000	0.96238	0.0376196
150000	0.0985673	0.901433		150000	0.961196	0.0388036

## Sheet: ValSusa
threshold	Model 1-continuity	Model 2-discontinuity	Model 1-continuity plague	Model 2-discontinuity plague
100	0.2	0.45	0.26	0.09
200	0.215	0.395	0.305	0.085
300	0.193333	0.406667	0.316667	0.0833333
400	0.21	0.3775	0.325	0.0875
500	0.222	0.356	0.348	0.074
25000	0.0704458	0.701203	0.072274	0.156077
50000	0.0737392	0.702457	0.0735012	0.150303
75000	0.0762801	0.701105	0.0753221	0.147293
100000	0.0776012	0.701393	0.0764369	0.144569
125000	0.0788342	0.702079	0.0772051	0.141882
150000	0.0799162	0.70266	0.0779679	0.139455
threshold	Model 1-continuity	Model 2-discontinuity		threshold	Model 1-continuity plague	Model 2-discontinuity plague
100	0.38	0.62		100	0.75	0.25
200	0.395	0.605		200	0.8	0.2
300	0.466667	0.533333		300	0.823333	0.176667
400	0.49	0.51		400	0.84	0.16
500	0.484	0.516		500	0.852	0.148
25000	0.116831	0.883169		25000	0.251229	0.748771
50000	0.123915	0.876085		50000	0.25444	0.74556
75000	0.129217	0.870783		75000	0.257749	0.742251
100000	0.133099	0.866901		100000	0.257827	0.742173
125000	0.137011	0.862989		125000	0.255305	0.744695
150000	0.140772	0.859228		150000	0.250758	0.749242
threshold	Model 1-continuity	Model 1-continuity plague		threshold	Model 2-discontinuity	Model 2-discontinuity plague
100	0.37	0.63		100	0.85	0.15
200	0.345	0.655		200	0.83	0.17
300	0.366667	0.633333		300	0.843333	0.156667
400	0.365	0.635		400	0.8575	0.1425
500	0.364	0.636		500	0.858	0.142
25000	0.47204	0.52796		25000	0.803466	0.196534
50000	0.489498	0.510502		50000	0.810123	0.189877
75000	0.495476	0.504524		75000	0.816303	0.183697
100000	0.498294	0.501706		100000	0.82189	0.17811
125000	0.499663	0.500337		125000	0.826862	0.173138
150000	0.500984	0.499016		150000	0.830432	0.169568

## Sheet: Torino
threshold	Model 1-continuity	Model 2-discontinuity	Model 1-continuity plague	Model 2-discontinuity plague
100	0.45	0.24	0.31	0
200	0.435	0.275	0.29	0
300	0.413333	0.286667	0.296667	0.00333333
400	0.4125	0.29	0.295	0.0025
500	0.402	0.3	0.296	0.002
25000	0.455402	0.391592	0.147732	0.00527423
50000	0.402765	0.453564	0.136212	0.00745805
75000	0.368596	0.497257	0.124817	0.00933068
100000	0.351392	0.519775	0.11812	0.010713
125000	0.340369	0.534334	0.113421	0.0118762
150000	0.33145	0.545909	0.10978	0.012862
threshold	Model 1-continuity	Model 2-discontinuity		threshold	Model 1-continuity plague	Model 2-discontinuity plague
100	0.71	0.29		100	0.99	0.01
200	0.685	0.315		200	0.985	0.015
300	0.68	0.32		300	0.983333	0.0166667
400	0.6725	0.3275		400	0.9825	0.0175
500	0.668	0.332		500	0.974	0.026
25000	0.543544	0.456456		25000	0.945418	0.0545825
50000	0.479177	0.520823		50000	0.937493	0.0625072
75000	0.434004	0.565996		75000	0.927533	0.0724671
100000	0.410066	0.589934		100000	0.916066	0.0839338
125000	0.394426	0.605574		125000	0.903438	0.0965623
150000	0.382014	0.617986		150000	0.895382	0.104618
threshold	Model 1-continuity	Model 1-continuity plague		threshold	Model 2-discontinuity	Model 2-discontinuity plague
100	0.56	0.44		100	1	0
200	0.55	0.45		200	0.985	0.015
300	0.536667	0.463333		300	0.97	0.03
400	0.5425	0.4575		400	0.975	0.025
500	0.542	0.458		500	0.974	0.026
25000	0.748995	0.251005		25000	0.975479	0.024521
50000	0.747233	0.252767		50000	0.97162	0.0283795
75000	0.748743	0.251257		75000	0.970246	0.0297544
100000	0.751041	0.248959		100000	0.969954	0.0300457
125000	0.753218	0.246782		125000	0.969514	0.0304861
150000	0.753643	0.246357		150000	0.968544	0.0314556
